# Supplementary material for: pH-Responsive doxorubicin delivery using shear-thinning biomaterials for localized melanoma treatment
Source: Royal Society of Chemistry journal article supplement (doi:10.1039/d1nr05738c), 2021-11-12
Supplement: d1nr05738c1.pdf [file d1nr05738c1.pdf]

## SUPPORTING INFORMATION

### **pH-responsive Doxorubicin Delivery using Shear-Thinning Biomaterials for Localized Melanoma Treatment**

Junmin Lee,<sup>a,b,c,d</sup> Yonggang Wang,<sup>c,d,e</sup> Chengbin Xue,<sup>c,d,f,g</sup> Yi Chen,<sup>c,d,h</sup> Moyuan Qu,<sup>c,d</sup> Jai Thakor,<sup>c,d</sup> Xingwu Zhou,<sup>c,d</sup> Natan Roberto de Barros,<sup>a</sup> Natashya Falcone,<sup>a</sup> Patric Young,<sup>a</sup> Floor W. van den Dolder,<sup>c,d</sup> Kangju Lee,<sup>a,c,d,i</sup> Yangzhi Zhu,<sup>a</sup> Hyun-Jong Cho,<sup>c,d,j</sup> Wujin Sun,<sup>a,c,d</sup> Bo Zhao,<sup>h</sup> Samad Ahadian,<sup>a,c,d</sup> Vadim Jucaud,<sup>a</sup> Mehmet R. Dokmeci,<sup>a,c,d</sup> Ali Khademhosseini<sup>\*a,c,d</sup> and Han-Jun Kim<sup>\*a,c,d</sup>

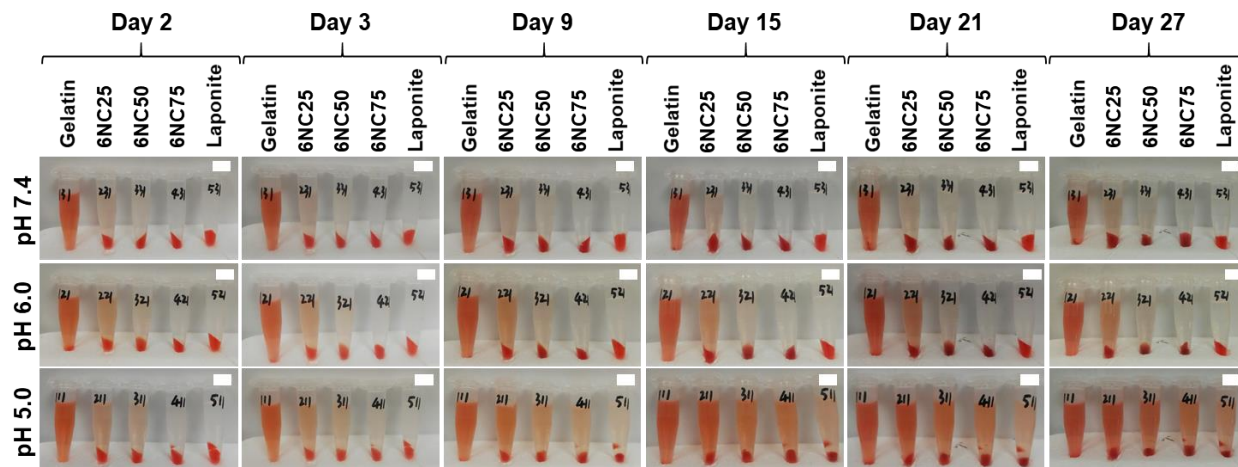

**Fig. S1.** Representative images of biomaterials with different compositions between gelatin and Laponite showing DOX release at pH 7.4, 6.0, and 5.0 for 30 days. Scale bar is 1 cm.

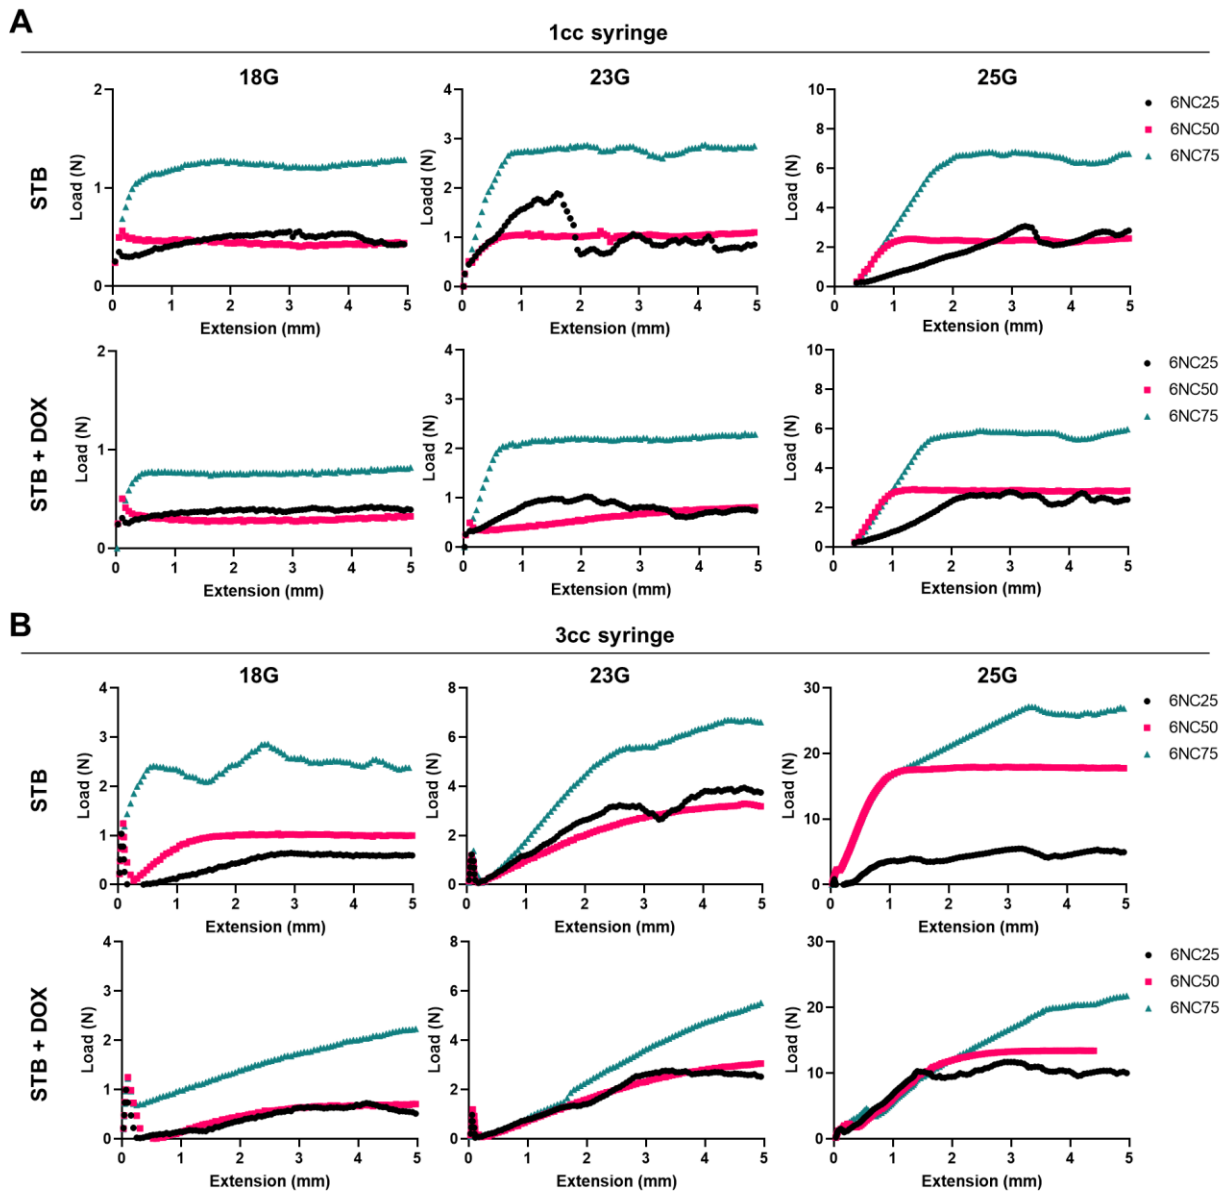

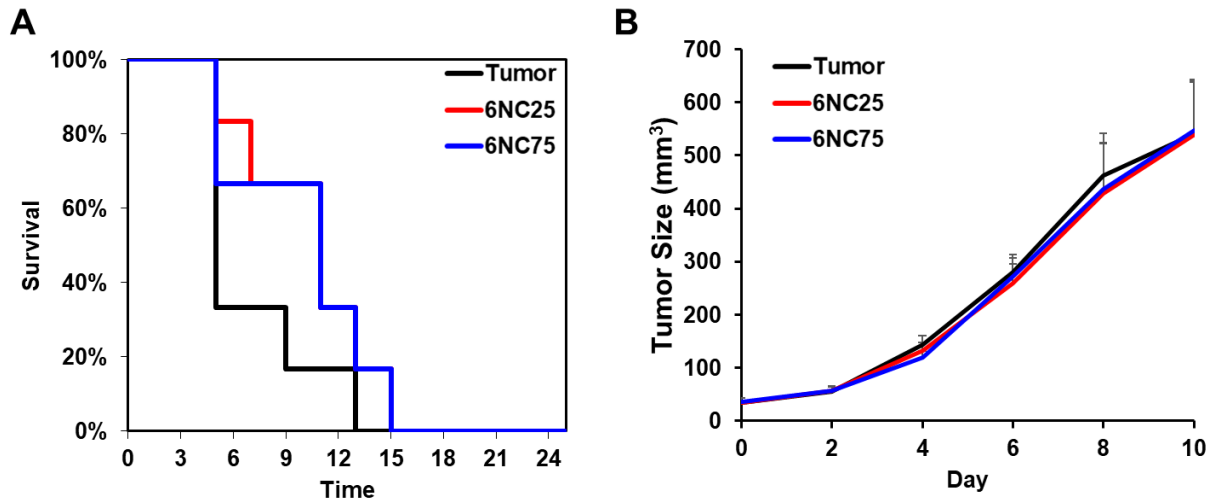

**Fig. S3.** (A) Kaplan-Meier survival analysis of STBs (6NC25, 6NC75) without DOX. (B) Tumor growth curve of STBs (6NC25, 6NC75) without DOX. There were no significant differences between STB-injected groups and Tumor-only groups.

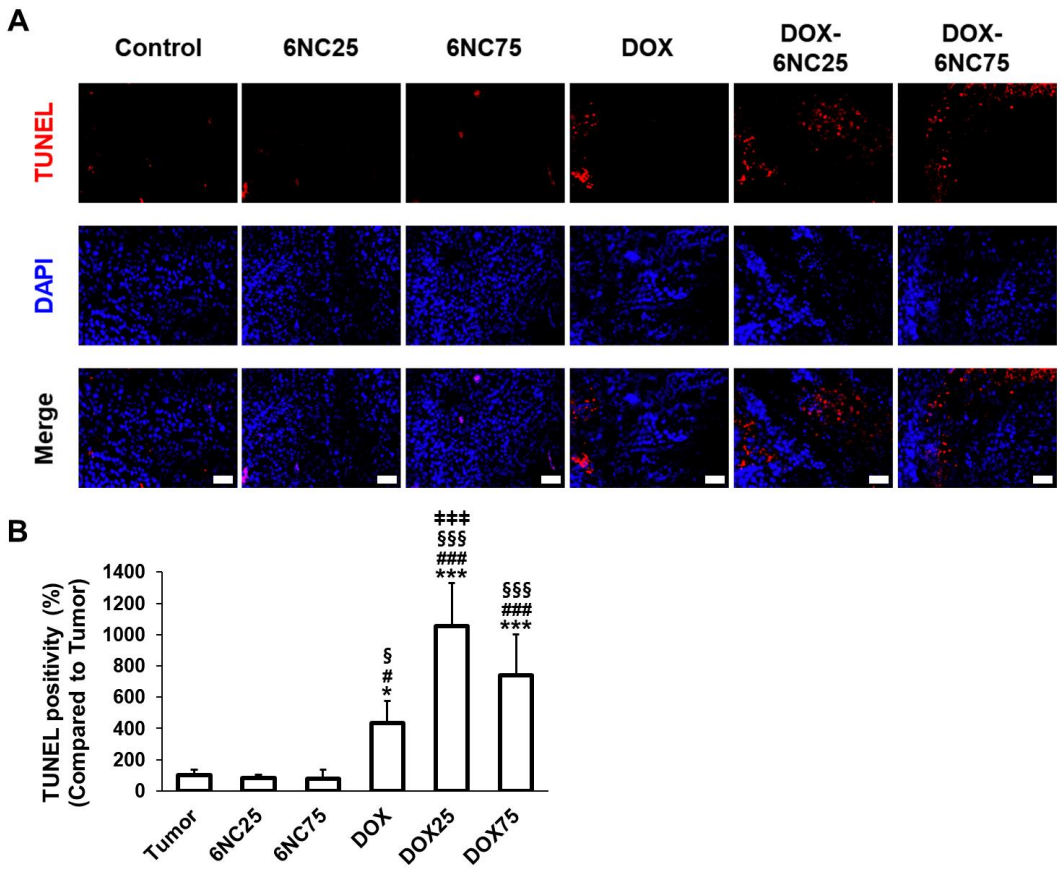

**Fig. S4.** (A) Representative immunofluorescence images of excised tumor tissues stained for DAPI (Blue) and TUNEL (Red) across the conditions. (B) The average percentage of cells positively expressing TUNEL. Scale bar is 50  $\mu$ m. \*, compared to Tumor, #, compared to 6NC25, §, compared to 6NC75, ‡, compared to DOX. \* $p < 0.05$ , \*\* $p < 0.01$ , \*\*\* $p < 0.001$ , ANOVA. Error bars are standard deviations.
